# Supplementary material for: Carbon prospecting in tropical forests for climate change mitigation
Source: PubMed Central journal article supplement (PMC7904812; doi:10.1038/s41467-021-21560-2), 2021-02-24
Supplement: 41467_2021_21560_MOESM1_ESM.pdf [file 41467_2021_21560_MOESM1_ESM.pdf]

# Carbon prospecting in tropical forests for climate change mitigation

Lian Pin Koh<sup>1</sup>, Yiwen Zeng<sup>2</sup>, Tasya Vadya Sarira, Kelly Siman

Correspondence to: [lianpinkoh@nus.edu.sg](mailto:lianpinkoh@nus.edu.sg); [zengyiwen@nus.edu.sg](mailto:zengyiwen@nus.edu.sg)

## **This PDF file includes:**

Supplementary Tables 1 to 2

Supplementary Figure 1 to 2

**Supplementary Table 1: Sensitivity analyses measuring the change in climate mitigation potential (CMP) associated with profitable areas.** These account for leakage (10%, 20% and 30%), increase in development and maintenance cost (50% and 100%), and opportunity cost (from agricultural rents and timber production).

| Country             | Original analysis (CMP)                 | Leakage: 10% (% CMP) | Leakage: 20% (% CMP) | Leakage: 30% (% CMP) | Cost: +50% (% CMP) | Cost: +100% (% CMP) | Opportunity Cost (% CMP) |
|---------------------|-----------------------------------------|----------------------|----------------------|----------------------|--------------------|---------------------|--------------------------|
| <b>World</b>        | <b>1,783,584,800<br/>±1,086,018,100</b> | <b>81.9 ±51.1</b>    | <b>64.6 ±40.4</b>    | <b>48.3 ±30.3</b>    | <b>80.4 ±50.4</b>  | <b>65.7 ±41.6</b>   | <b>52.3 ±33.2</b>        |
| <b>Americas</b>     | <b>809,093,200<br/>±487,743,200</b>     | <b>81 ±50.3</b>      | <b>62.7 ±39</b>      | <b>45.4 ±28.4</b>    | <b>76.5 ±47.8</b>  | <b>58.6 ±37.2</b>   | <b>59.5 ±37.2</b>        |
| Brazil              | 426,173,000<br>±256,966,200             | 82.1 ±50.7           | 65.3 ±40.3           | 49.5 ±30.7           | 82 ±50.7           | 68.5 ±42.9          | 62.8 ±39.3               |
| Bolivia             | 95,975,000<br>±60,827,300               | 80.5 ±52.8           | 60.8 ±40.2           | 42 ±28.1             | 72.3 ±48.1         | 48.7 ±33.5          | 77.8 ±51.1               |
| Mexico              | 51,486,600<br>±36,756,100               | 81.7 ±59.3           | 63.1 ±46.1           | 43.8 ±32.4           | 75.6 ±55.6         | 40.9 ±32.5          | 49.1 ±35.9               |
| Peru                | 50,817,100<br>±29,151,800               | 74.6 ±45.7           | 47.8 ±30.6           | 24.1 ±15.7           | 46.4 ±30.3         | 25 ±15.6            | 3.8 ±2.5                 |
| Colombia            | 40,161,800<br>±21,079,200               | 81.9 ±44             | 64.2 ±34.7           | 47.1 ±25.6           | 79.1 ±42.9         | 61.3 ±34            | 33 ±18.5                 |
| Venezuela           | 35,649,200<br>±20,640,000               | 82.2 ±48.7           | 64.3 ±38.3           | 47.3 ±28.4           | 79.5 ±47.4         | 62.4 ±37.7          | 62.1 ±36.7               |
| Paraguay            | 25,038,700<br>±19,983,200               | 82.4 ±66.9           | 64.9 ±52.9           | 49.5 ±40.2           | 81.4 ±66.2         | 73.8 ±59.7          | 98.6 ±79.9               |
| Guyana              | 18,077,700<br>±6,308,500                | 70.2 ±27.8           | 46.8 ±18.3           | 29 ±11.5             | 51.6 ±20.3         | 28.9 ±11.8          | 18.3 ±7.6                |
| Ecuador             | 12,842,900<br>±6,670,800                | 82.9 ±44             | 66 ±35.2             | 48.7 ±26.4           | 81.8 ±44.1         | 62.3 ±34.6          | 47.5 ±25.8               |
| Suriname            | 12,206,400<br>±3,946,600                | 75.5 ±26.3           | 53.1 ±19.3           | 28.6 ±11.2           | 54.5 ±21.3         | 25.4 ±9.9           | 14.9 ±5.3                |
| Cuba                | 5,772,900<br>±4,017,400                 | 70.6 ±52.9           | 41.9 ±32.3           | 17.9 ±14.6           | 37.6 ±30.4         | 8.5 ±7.5            | 85.8 ±62.5               |
| Argentina           | 5,642,700<br>±4,843,300                 | 84.6 ±73.5           | 69.7 ±60.6           | 55 ±48               | 90 ±78.4           | 79.9 ±70.2          | 34.8 ±30.3               |
| Guatemala           | 5,453,000<br>±3,363,300                 | 79 ±50.8             | 55.8 ±37.3           | 28.1 ±20.3           | 56 ±39.7           | 17.9 ±13.5          | 13.1 ±9.1                |
| French Guiana       | 4,413,500<br>±1,314,000                 | 77.7 ±24.9           | 56.1 ±18.9           | 34.3 ±12.1           | 61.5 ±21.1         | 29.1 ±11.2          | 2.2 ±0.8                 |
| Nicaragua           | 4,355,700<br>±2,613,500                 | 68.5 ±44.6           | 39.1 ±26.6           | 16 ±11.5             | 34 ±24             | 8.1 ±6              | 64.7 ±40.9               |
| Honduras            | 3,757,700<br>±2,300,100                 | 73.1 ±47.5           | 48.9 ±32.2           | 27.9 ±19             | 51.6 ±34.6         | 22.2 ±15.7          | 44.3 ±29                 |
| Panama              | 2,907,800<br>±1,790,400                 | 66.9 ±45.4           | 39.1 ±27             | 18.4 ±13.1           | 36.7 ±25.9         | 12.1 ±9             | 23 ±15.4                 |
| Belize              | 2,429,400<br>±1,370,500                 | 78.7 ±46.5           | 55.4 ±33.6           | 33.5 ±20.8           | 60.7 ±37.3         | 33.4 ±20.9          | 14.6 ±9                  |
| Dominican Republic  | 2,224,200<br>±1,475,300                 | 79.2 ±54.4           | 57.2 ±40.1           | 35.7 ±25.4           | 63.5 ±45           | 34 ±25.2            | 37.2 ±25.5               |
| Costa Rica          | 1,512,000<br>±868,300                   | 61.6 ±39.8           | 33.3 ±21.8           | 14.3 ±9.5            | 28.9 ±19.2         | 8.4 ±5.7            | 59.1 ±37.1               |
| El Salvador         | 720,900<br>±484,100                     | 76.1 ±53.3           | 51.8 ±36.6           | 30.4 ±21.9           | 56.6 ±40.9         | 24.9 ±18.3          | 99.8 ±69                 |
| Jamaica             | 457,900<br>±267,700                     | 73.8 ±46.5           | 47.9 ±30.9           | 24.9 ±16.7           | 47.6 ±31.3         | 17 ±11.8            | 100 ±61.7                |
| Trinidad and Tobago | 299,300<br>±180,600                     | 66.5 ±44.1           | 39.5 ±26             | 20.5 ±14             | 39.5 ±26.8         | 15.9 ±10.9          | 30.7 ±19                 |

**Supplementary Table 1 (con't): Sensitivity analyses measuring the change in climate mitigation potential (CMP) associated with profitable areas.** These account for leakage (10%, 20% and 30%), increase in development and maintenance cost (50% and 100%), and opportunity cost (from agricultural rents and timber production).

| Country                          | Original analysis (CMP)         | Leakage: 10% (% CMP) | Leakage: 20% (% CMP) | Leakage: 30% (% CMP) | Cost: +50% (% CMP) | Cost: +100% (% CMP) | Opportunity Cost (% CMP) |
|----------------------------------|---------------------------------|----------------------|----------------------|----------------------|--------------------|---------------------|--------------------------|
| Haiti                            | 268,500 ±204,800                | 74.1 ±59.7           | 49.1 ±39.7           | 26.2 ±22.1           | 51.1 ±42.5         | 15.6 ±14.2          | 27.6 ±21.6               |
| Bahamas                          | 234,900 ±174,900                | 83.6 ±63.2           | 66.7 ±50.7           | 49.7 ±38.3           | 83.6 ±64           | 63.6 ±50.4          | 100 ±75.3                |
| Guadeloupe                       | 44,800 ±29,700                  | 68.9 ±49.3           | 45.2 ±32.7           | 24.2 ±17.9           | 44 ±31.1           | 13.1 ±11.9          | 100 ±70.9                |
| Puerto Rico                      | 34,800 ±21,700                  | 82.7 ±52.7           | 60.7 ±40.3           | 37.8 ±24.8           | 63.1 ±42.4         | 41.5 ±28.6          | 100 ±63.4                |
| Cayman Islands                   | 24,200 ±15,100                  | 52 ±38.1             | 25.5 ±21.9           | 5.5 ±4.2             | 13 ±12.3           | 6.4 ±4              | 100 ±72.1                |
| Antigua and Barbuda              | 23,500 ±19,100                  | 75.4 ±62.5           | 56.7 ±47.3           | 32.3 ±28             | 61 ±53.6           | 26.7 ±25.2          | 100 ±82.7                |
| Turks and Caicos Islands         | 23,300 ±18,500                  | 81 ±66               | 58 ±48.7             | 38.9 ±33.5           | 67.8 ±55.5         | 32.6 ±29.5          | 100 ±80.6                |
| Saint Lucia                      | 21,500 ±12,600                  | 68.4 ±42.4           | 40.7 ±27             | 16.2 ±11.7           | 39.7 ±27.9         | 10.1 ±8.5           | 100 ±63.6                |
| Martinique                       | 13,400 ±8,200                   | 79 ±51.4             | 45.1 ±29.5           | 14.7 ±12.3           | 40.9 ±30.8         | 4.5 ±4              | 100 ±61                  |
| Grenada                          | 8,800 ±5,100                    | 67.2 ±45             | 0 ±5.9               | 0 ±0                 | 0 ±0               | 0 ±0                | 100 ±57.8                |
| Saint Kitts and Nevis            | 6,400 ±4,400                    | 61.4 ±46.2           | 46.6 ±32.1           | 38.9 ±26.7           | 62.2 ±42.8         | 49.7 ±34.2          | 100 ±72.6                |
| Curaçao                          | 3,600 ±3,400                    | 68.5 ±76.3           | 0 ±6.4               | 0 ±0                 | 0 ±0               | 0 ±0                | 100 ±119                 |
| Saint Vincent and the Grenadines | 3,300 ±2,100                    | 87.5 ±55.6           | 75 ±68.4             | 0 ±0                 | 0 ±0               | 0 ±0                | 100 ±85                  |
| Montserrat                       | 3,200 ±2,300                    | 68.8 ±56.8           | 40.8 ±30.4           | 34 ±25.4             | 54.3 ±40.6         | 54.3 ±40.6          | 100 ±74.4                |
| Virgin Islands, U.S.             | 1,800 ±1,200                    | 87.5 ±62             | 57.1 ±41.3           | 20.8 ±19.8           | 48.8 ±41.5         | 0 ±0                | 100 ±67.6                |
| Bonaire, Sint Eustatius and Saba | 1,200 ±1,100                    | 50.1 ±45.6           | 43 ±39               | 0 ±0                 | 0 ±0               | 0 ±0                | 100 ±91.2                |
| Virgin Islands, British          | 600 ±400                        | 35 ±22.9             | 30 ±28               | 0 ±0                 | 0 ±0               | 0 ±0                | 100 ±82.2                |
| Barbados                         | 200 ±200                        | 87.5 ±71             | 0 ±22.5              | 0 ±0                 | 0 ±0               | 0 ±0                | 100 ±81.2                |
| <b>Africa</b>                    | <b>392,659,400 ±286,485,300</b> | <b>67.4 ±53.3</b>    | <b>41.3 ±32.8</b>    | <b>23.5 ±18.6</b>    | <b>42.8 ±33.9</b>  | <b>24.9 ±19.5</b>   | <b>69.9 ±55.1</b>        |
| DR Congo                         | 85,257,800 ±45,293,000          | 60 ±37.6             | 33.5 ±20.3           | 18.8 ±11.2           | 34.3 ±20.4         | 19 ±11.2            | 39.3 ±24.3               |
| Angola                           | 51,008,400 ±42,975,100          | 66.8 ±60.5           | 40.3 ±36.9           | 21 ±19.4             | 40 ±36.8           | 16.8 ±16            | 99.1 ±89.1               |
| Tanzania                         | 33,716,700 ±29,792,000          | 64.8 ±61.6           | 36.1 ±35             | 16.4 ±16.2           | 32.9 ±32.3         | 10.4 ±10.6          | 97.8 ±91.8               |
| Zambia                           | 29,791,200 ±25,981,700          | 65.9 ±62.9           | 31.1 ±31.4           | 10.7 ±10.8           | 23.2 ±23.6         | 7 ±6.9              | 100 ±92.3                |
| Central African Republic         | 28,178,200 ±21,167,400          | 60.9 ±51.5           | 31.9 ±27.3           | 14.1 ±12.2           | 28.4 ±24.5         | 10.7 ±9.1           | 96.4 ±80.5               |
| Mozambique                       | 27,670,900 ±24,102,500          | 67.1 ±62.7           | 39.8 ±37.9           | 20 ±19.4             | 38.7 ±37.1         | 15.4 ±15.2          | 100 ±92.5                |
| Congo                            | 22,461,100 ±11,264,400          | 67.4 ±37.7           | 41.5 ±23.2           | 25.7 ±13.8           | 44.7 ±24.3         | 32.1 ±17.2          | 22.2 ±12.4               |
| Cameroon                         | 20,545,600 ±12,299,300          | 79.5 ±49.4           | 61.8 ±38.1           | 47 ±28.8             | 77.5 ±47.6         | 68.6 ±42            | 21.7 ±14.2               |
| Gabon                            | 18,982,000 ±6,677,500           | 77.8 ±29.2           | 58.8 ±22             | 42.8 ±16             | 71.8 ±26.8         | 59.1 ±22.1          | 36.8 ±14.8               |

**Supplementary Table 1 (con't): Sensitivity analyses measuring the change in climate mitigation potential (CMP) associated with profitable areas.** These account for leakage (10%, 20% and 30%), increase in development and maintenance cost (50% and 100%), and opportunity cost (from agricultural rents and timber production).

| Country           | Original analysis (CMP)   | Leakage: 10% (% CMP) | Leakage: 20% (% CMP) | Leakage: 30% (% CMP) | Cost: +50% (% CMP) | Cost: +100% (% CMP) | Opportunity Cost (% CMP) |
|-------------------|---------------------------|----------------------|----------------------|----------------------|--------------------|---------------------|--------------------------|
| South Sudan       | 11,575,800<br>±11,390,500 | 76.3 ±74.7           | 41.7 ±41.5           | 9.4 ±9.7             | 25.6 ±26           | 0.8 ±0.9            | 100 ±98.7                |
| Ethiopia          | 10,327,900<br>±9,862,700  | 75.3 ±74.5           | 55.1 ±54.6           | 38.3 ±37.9           | 65.4 ±64.8         | 49.5 ±49            | 100 ±99.2                |
| Nigeria           | 8,290,900<br>±7,758,100   | 65.5 ±65.8           | 38.8 ±39.1           | 20.7 ±21.1           | 39 ±39.5           | 18.1 ±18.7          | 42 ±43                   |
| Madagascar        | 6,352,100<br>±5,271,300   | 68 ±60.5             | 43 ±38.4             | 24 ±21.8             | 44.4 ±39.9         | 21.8 ±20.1          | 61.9 ±55                 |
| Guinea            | 4,464,600<br>±3,965,000   | 67.3 ±63.5           | 41.8 ±40.1           | 21.8 ±21.1           | 41 ±40             | 22.3 ±20.8          | 74.4 ±71.4               |
| Côte d'Ivoire     | 4,243,600<br>±3,384,600   | 67.7 ±57.7           | 44.4 ±37.8           | 28.9 ±24.1           | 50.1 ±42.2         | 37.3 ±31.1          | 46.1 ±41.3               |
| Zimbabwe          | 4,149,900<br>±4,142,800   | 45.5 ±51.3           | 19.7 ±22.2           | 8.2 ±9.2             | 16.6 ±18.6         | 5.7 ±6.7            | 100 ±112.3               |
| Ghana             | 3,942,100<br>±3,366,000   | 76.1 ±67.8           | 56.5 ±50             | 41.2 ±36.5           | 69.3 ±61.3         | 55.1 ±48.9          | 11.3 ±11                 |
| Liberia           | 3,442,400<br>±1,384,000   | 83.7 ±34.5           | 67.9 ±28.2           | 51.5 ±21.7           | 85.4 ±35.6         | 68.2 ±29.4          | 1.2 ±0.6                 |
| Kenya             | 2,360,900<br>±2,333,000   | 72.6 ±74.7           | 49 ±50.4             | 31.3 ±32.2           | 55.4 ±57           | 34.2 ±35.6          | 55 ±56.5                 |
| Senegal           | 1,934,700<br>±1,947,000   | 47.8 ±52.8           | 24.6 ±26.1           | 11.6 ±12.2           | 22.1 ±23.4         | 6.3 ±7.4            | 100 ±112.5               |
| Uganda            | 1,711,400<br>±1,505,200   | 63 ±61.2             | 38.2 ±35.5           | 20.6 ±19.6           | 40.3 ±38.8         | 25.7 ±23.8          | 85.3 ±81.6               |
| Chad              | 1,711,100<br>±1,736,800   | 58.8 ±65.8           | 28 ±32.3             | 9 ±10.7              | 20.8 ±24.2         | 3.1 ±4              | 100 ±108.8               |
| Equatorial Guinea | 1,685,500<br>±535,300     | 82.8 ±27.3           | 67.4 ±22.1           | 52.9 ±17.5           | 87 ±28.5           | 77.2 ±25.7          | 97.1 ±32.2               |
| Malawi            | 1,552,200<br>±1,430,200   | 64.7 ±63.7           | 38.7 ±38.6           | 21.1 ±21.2           | 39.5 ±39.3         | 17 ±17.1            | 100 ±97.7                |
| Benin             | 1,481,700<br>±1,472,700   | 50.3 ±57.3           | 19.7 ±22.2           | 6 ±7.2               | 14 ±16.2           | 2.6 ±2.9            | 100 ±109.2               |
| Mali              | 959,900<br>±977,000       | 16.8 ±24.5           | 1 ±1.6               | 0 ±0                 | 0.2 ±0.4           | 0 ±0                | 100 ±125.2               |
| Sudan             | 913,800<br>±926,100       | 29.2 ±38.4           | 1.7 ±2.7             | 0 ±0                 | 0 ±0               | 0 ±0                | 100 ±110.9               |
| Guinea-Bissau     | 900,700<br>±802,100       | 55.1 ±54.5           | 27.6 ±27.1           | 12.1 ±12             | 24.4 ±24.5         | 7.4 ±7.7            | 100 ±96.6                |
| Togo              | 815,600<br>±787,000       | 43 ±48.2             | 16.3 ±19             | 5.6 ±6.3             | 12.6 ±13.7         | 5.2 ±5.2            | 82.6 ±92.4               |
| Sierra Leone      | 663,500<br>±430,300       | 78.3 ±52.6           | 61.1 ±40.9           | 45.1 ±30.3           | 75 ±50.3           | 59.9 ±40.6          | 18.4 ±14                 |
| Botswana          | 356,200<br>±360,000       | 83.2 ±82.9           | 63.9 ±63.7           | 7.7 ±8.7             | 35.7 ±36.8         | 0 ±0                | 100 ±99.5                |
| South Africa      | 252,600<br>±244,800       | 65 ±67.8             | 39.6 ±41.8           | 20.6 ±21.6           | 40.5 ±42.5         | 19.9 ±20.9          | 100 ±102.8               |
| Burkina Faso      | 224,500<br>±225,200       | 40.9 ±49.3           | 1.3 ±4.8             | 0 ±0                 | 0 ±0               | 0 ±0                | 100 ±110.5               |
| Namibia           | 211,500<br>±216,000       | 10.5 ±19.8           | 4.9 ±5               | 0 ±0                 | 0 ±2               | 0 ±0                | 100 ±127.9               |
| Somalia           | 201,100<br>±204,900       | 41.7 ±51.3           | 21 ±22.8             | 10.3 ±10.6           | 16.5 ±17           | 8.9 ±9.1            | 100 ±115.9               |
| Burundi           | 135,400<br>±120,100       | 62.1 ±57.7           | 38.1 ±35.1           | 12.2 ±11             | 28.5 ±26.4         | 4.2 ±3.7            | 98 ±90.7                 |

**Supplementary Table 1 (con't): Sensitivity analyses measuring the change in climate mitigation potential (CMP) associated with profitable areas.** These account for leakage (10%, 20% and 30%), increase in development and maintenance cost (50% and 100%), and opportunity cost (from agricultural rents and timber production).

| Country               | Original analysis (CMP)             | Leakage: 10% (% CMP) | Leakage: 20% (% CMP) | Leakage: 30% (% CMP) | Cost: +50% (% CMP) | Cost: +100% (% CMP) | Opportunity Cost (% CMP) |
|-----------------------|-------------------------------------|----------------------|----------------------|----------------------|--------------------|---------------------|--------------------------|
| Gambia                | 85,900<br>±85,200                   | 70.2 ±72.1           | 40.6 ±42             | 16.2 ±17.2           | 33.5 ±35.6         | 3.8 ±4.8            | 100 ±101.5               |
| Rwanda                | 52,300<br>±44,600                   | 74.2 ±63.7           | 55.8 ±47.2           | 26.8 ±23.5           | 60.4 ±52.4         | 15.4 ±13.9          | 98.5 ±85.1               |
| Sao Tome and Principe | 35,800<br>±17,100                   | 81.7 ±40.6           | 63.6 ±32.6           | 44 ±22.8             | 74 ±36.7           | 57 ±28.2            | 100 ±50.4                |
| Comoros               | 6,000 ±3,600                        | 0 ±13.6              | 0 ±0                 | 0 ±0                 | 0 ±0               | 0 ±0                | 100 ±87.4                |
| Mayotte               | 5,900 ±3,300                        | 35.2 ±24.1           | 16.5 ±13.5           | 0 ±4.2               | 22 ±18.5           | 0 ±0                | 100 ±68.7                |
| <b>Asia-Pacific</b>   | <b>581,832,200<br/>±311,789,600</b> | <b>85.5 ±46.3</b>    | <b>70.8 ±38.5</b>    | <b>55.7 ±30.5</b>    | <b>91.2 ±49.7</b>  | <b>80.2 ±44.4</b>   | <b>42 ±23.4</b>          |
| Indonesia             | 230,478,400<br>±99,746,400          | 85.5 ±37.4           | 71.2 ±31.2           | 56.8 ±25             | 92.4 ±40.7         | 84.6 ±37.5          | 41.2 ±19                 |
| Malaysia              | 53,632,000<br>±21,366,700           | 86.2 ±34.6           | 72.2 ±29.1           | 58 ±23.5             | 94.2 ±38.1         | 86.6 ±35.5          | 21.3 ±9.7                |
| India                 | 49,742,000<br>±43,362,700           | 84.9 ±74.7           | 69.1 ±61.1           | 51.4 ±46.2           | 86.5 ±77.2         | 60.1 ±56            | 34.3 ±30.2               |
| Thailand              | 39,054,400<br>±26,658,300           | 85.7 ±59             | 71.2 ±49.1           | 56.3 ±39             | 92 ±63.6           | 81.6 ±57.1          | 27.3 ±18.8               |
| Myanmar               | 35,182,200<br>±21,480,500           | 83.7 ±52             | 66.9 ±41.9           | 49.7 ±31.4           | 83.1 ±52.4         | 65.9 ±42.1          | 10.2 ±6.8                |
| Australia             | 33,746,100<br>±23,335,000           | 85.6 ±59.7           | 70.2 ±49.3           | 54.3 ±38.4           | 89.6 ±63           | 73.9 ±53.3          | 96.8 ±67.3               |
| Cambodia              | 28,307,400<br>±17,178,600           | 87.2 ±53             | 74.3 ±45.2           | 61.2 ±37.3           | 98.4 ±60           | 94.1 ±57.9          | 73.6 ±44.7               |
| China                 | 28,294,400<br>±16,089,800           | 86.1 ±49.3           | 72 ±41.3             | 57.6 ±33.2           | 93.6 ±53.9         | 85.4 ±49.6          | 32.9 ±20.6               |
| Viet Nam              | 24,031,300<br>±14,475,100           | 85.9 ±52.1           | 71.6 ±43.6           | 57 ±34.9             | 92.9 ±56.7         | 84.1 ±51.8          | 45.8 ±28.7               |
| Laos                  | 22,122,800<br>±10,166,500           | 85.3 ±39.8           | 70.4 ±32.9           | 55.3 ±26.1           | 90.6 ±42.5         | 79.7 ±38            | 43.6 ±21                 |
| Papua New Guinea      | 16,503,600<br>±6,223,400            | 74.2 ±30.7           | 51 ±21.4             | 30.8 ±13.3           | 55.5 ±23.8         | 28.9 ±13.2          | 24.9 ±10                 |
| Philippines           | 10,133,500<br>±5,156,000            | 84.2 ±43.7           | 68.2 ±35.6           | 51.3 ±27.1           | 85.4 ±45           | 67.9 ±36.7          | 62.3 ±32.3               |
| Bangladesh            | 4,154,400<br>±2,934,100             | 86.2 ±61.1           | 72.4 ±51.4           | 58.6 ±41.7           | 94.8 ±67.4         | 87.8 ±63            | 77.6 ±55                 |
| Sri Lanka             | 4,153,800<br>±2,540,800             | 86.8 ±53.3           | 73.5 ±45.2           | 60.3 ±37.1           | 97.1 ±59.7         | 91.7 ±57.2          | 100 ±61.3                |
| Brunei Darussalam     | 1,101,000<br>±431,600               | 85.3 ±33.9           | 70.5 ±28.2           | 54.8 ±22.2           | 90.5 ±36.4         | 77.8 ±31.9          | 48.4 ±20.9               |
| Taiwan                | 598,200<br>±308,400                 | 83.4 ±44.1           | 65.9 ±35.1           | 48.6 ±26.1           | 81.7 ±43.9         | 63.8 ±35.3          | 100 ±52.6                |
| Timor-Leste           | 471,000<br>±261,300                 | 84.9 ±47.7           | 69.6 ±39.4           | 53.6 ±30.6           | 88.8 ±50.5         | 74.6 ±43.1          | 100 ±56                  |
| Hong Kong             | 124,600<br>±73,300                  | 84.6 ±50.9           | 66.7 ±40.6           | 49.5 ±30.3           | 82 ±49.7           | 60.8 ±38.4          | 93.7 ±55.8               |
| Singapore             | 1,200 ±1,000                        | 87.5 ±73.7           | 75 ±63.2             | 62.5 ±52.6           | 100 ±84.2          | 100 ±84.2           | 58.7 ±49.4               |

**Supplementary Table 2: Comparisons between volumes of estimated investible carbon and verified carbon units (VCUs) issued within verified tropical VCS project areas between 2005–2018.** Data obtained from <https://verra.org/>.

| Country    | ID   | Name                                                                                 | Status                       | # Years with data | Years     | VCUs (MtCO <sub>2</sub> yr <sup>-1</sup> ) | Estimated Values (MtCO <sub>2</sub> yr <sup>-1</sup> ) |
|------------|------|--------------------------------------------------------------------------------------|------------------------------|-------------------|-----------|--------------------------------------------|--------------------------------------------------------|
| Brazil     | 963  | The Purus Project                                                                    | Verified, under verification | 7                 | 2011–2017 | 0.0095 ± 0.0051                            | 0.0374 ± 0.0011                                        |
|            | 977  | RMDLT Portel-Para REDD Project                                                       | Verification approved        | 5                 | 2009–2017 | 0.097 ± 0.113                              | 0.1748 ± 0.0053                                        |
|            | 1112 | The Russas Project                                                                   | Verified, under verification | 2                 | 2011–2014 | 0.0078 ± 0.0024                            | 0.0422 ± 0.0013                                        |
|            | 1113 | The Valparaiso Project                                                               | Verified, under verification | 3                 | 2012–2014 | 0.0032 ± 0.0021                            | 0.0228 ± 0.0007                                        |
|            | 1382 | The Envira Amazonia Project - A Tropical Forest Conservation Project in Acre, Brazil | Verified, under verification | 4                 | 2012–2018 | 0.0317 ± 0.0374                            | 0.0597 ± 0.0018                                        |
| Cambodia   | 1650 | Reduced Emissions from Deforestation and Degradation in Keo Seima Wildlife Sanctuary | Verification approved        | 3                 | 2013–2017 | 0.1182 ± 0.1575                            | 0.8828 ± 0.0266                                        |
| Colombia   | 856  | Chocó-Darién Conservation Corridor REDD Project                                      | Verification approved        | 2                 | 2010–2012 | 0.0025 ± 0.002                             | 0.0038 ± 0.0001                                        |
| DR Congo   | 934  | Mai Ndombe REDD+ Project                                                             | Verification approved        | 6                 | 2011–2016 | 0.6565 ± 0.58                              | 0.4573 ± 0.0137                                        |
|            | 1359 | Isangi REDD+ Project                                                                 | Verification approved        | 5                 | 2009–2013 | 0.0219 ± 0.0243                            | 0.0807 ± 0.0024                                        |
| Ethiopia   | 1340 | Bale Mountains Eco-region REDD+ Project                                              | Verification approved        | 4                 | 2012–2015 | 0.7359 ± 0.5087                            | 1.1743 ± 0.034                                         |
| Guatemala  | 1622 | REDD+ Project for Caribbean Guatemala: The Conservation Coast                        | Verified, under verification | 7                 | 2012–2018 | 0.1476 ± 0.1042                            | 0.1899 ± 0.0056                                        |
| Indonesia  | 674  | Rimba Raya Biodiversity Reserve Project                                              | Verification approved        | 9                 | 2009–2017 | 0.1528 ± 0.1728                            | 0.159 ± 0.0035                                         |
| Kenya      | 1408 | Chyulu Hills REDD+ Project                                                           | Verification approved        | 3                 | 2013–2016 | 0.1056 ± 0.1089                            | 0.0227 ± 0.0003                                        |
| Madagascar | 1215 | The Makira Forest Protected Area in Madagascar                                       | Verification approved        | 2                 | 2005–2013 | 0.0026 ± 0.0018                            | 0.0634 ± 0.0016                                        |
| Malawi     | 1168 | Kulera Landscape REDD+ Program for Co-Managed Protected Areas, Malawi                | Verification approved        | 1                 | 2009–2009 | 0.0025                                     | 0.1765 ± 0.0047                                        |
| Paraguay   | 1403 | The Paraguay Forest Conservation Project                                             | Verification approved        | 1                 | 2010–2010 | 0.0006                                     | 0.0018 ± 0.0001                                        |

**Supplementary Table 2 (con't): Comparisons between volumes of estimated investible carbon and verified carbon units (VCUs) issued within verified tropical VCS project areas between 2005–2018.** Data obtained from <https://verra.org/>.

| Country      | ID   | Name                                                                                                                               | Status                       | # Years with data | Years     | VCUs (MtCO <sub>2</sub> yr <sup>-1</sup> ) | Estimated Values (MtCO <sub>2</sub> yr <sup>-1</sup> ) |
|--------------|------|------------------------------------------------------------------------------------------------------------------------------------|------------------------------|-------------------|-----------|--------------------------------------------|--------------------------------------------------------|
| Peru         | 844  | Madre de Dios Amazon REDD Project                                                                                                  | Verification approved        | 7                 | 2009–2018 | 0.0174 ± 0.0172                            | 0.0951 ± 0.0028                                        |
|              | 944  | Alto Mayo Conservation Initiative                                                                                                  | Verified, under verification | 4                 | 2008–2016 | 0.0472 ± 0.0396                            | 0.0243 ± 0.0007                                        |
|              | 958  | Biocorredor Martin Sagrado Project                                                                                                 | Verification approved        | 1                 | 2010–2010 | 0.005                                      | 0.0469 ± 0.0014                                        |
|              | 985  | Cordillera Azul National Park REDD Project                                                                                         | Verification approved        | 7                 | 2008–2017 | 0.4019 ± 0.3269                            | 0.0001 ± 0                                             |
|              | 1360 | Forest Management to Reduce Deforestation and Degradation in Shipibo Conibo and Cacataibo Indigenous Communities of Ucayali Region | Verification approved        | 8                 | 2010–2017 | 0.1426 ± 0.1762                            | 0.1184 ± 0.0033                                        |
| Sierra Leone | 1201 | Gola REDD Project                                                                                                                  | Verification approved        | 3                 | 2012–2014 | 0.0135 ± 0.0122                            | 0.08 ± 0.0024                                          |
| Tanzania     | 1325 | Mjumita community forest project (Lindi)                                                                                           | Verification approved        | 1                 | 2012–2012 | 0.0004                                     | 0.0596 ± 0.0015                                        |
| Zambia       | 1202 | Lower Zambezi REDD+ Project                                                                                                        | Verification approved        | 10                | 2009–2018 | 0.0098 ± 0.0071                            | 0.0251 ± 0.0006                                        |
| Zimbabwe     | 902  | Kariba REDD+ Project                                                                                                               | Verification approved        | 6                 | 2011–2016 | 0.0327 ± 0.033                             | 0.0815 ± 0.002                                         |

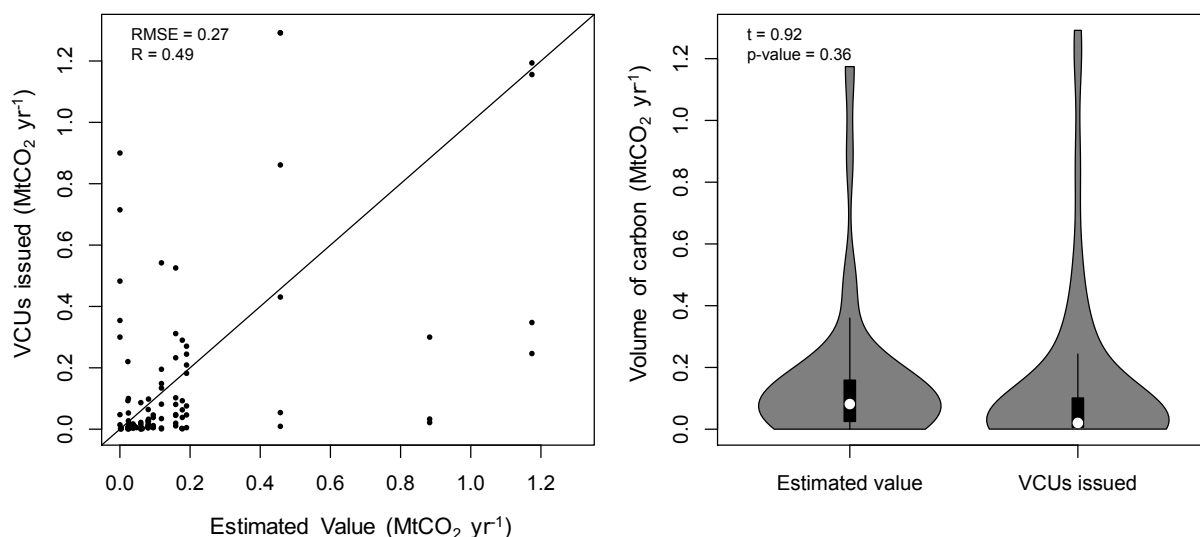

**Supplementary Figure 1: Estimates of investible carbon credits are significantly correlated to the verified credits generated from existing verified tropical avoided deforestation projects.** Data from Supplementary Table 1.

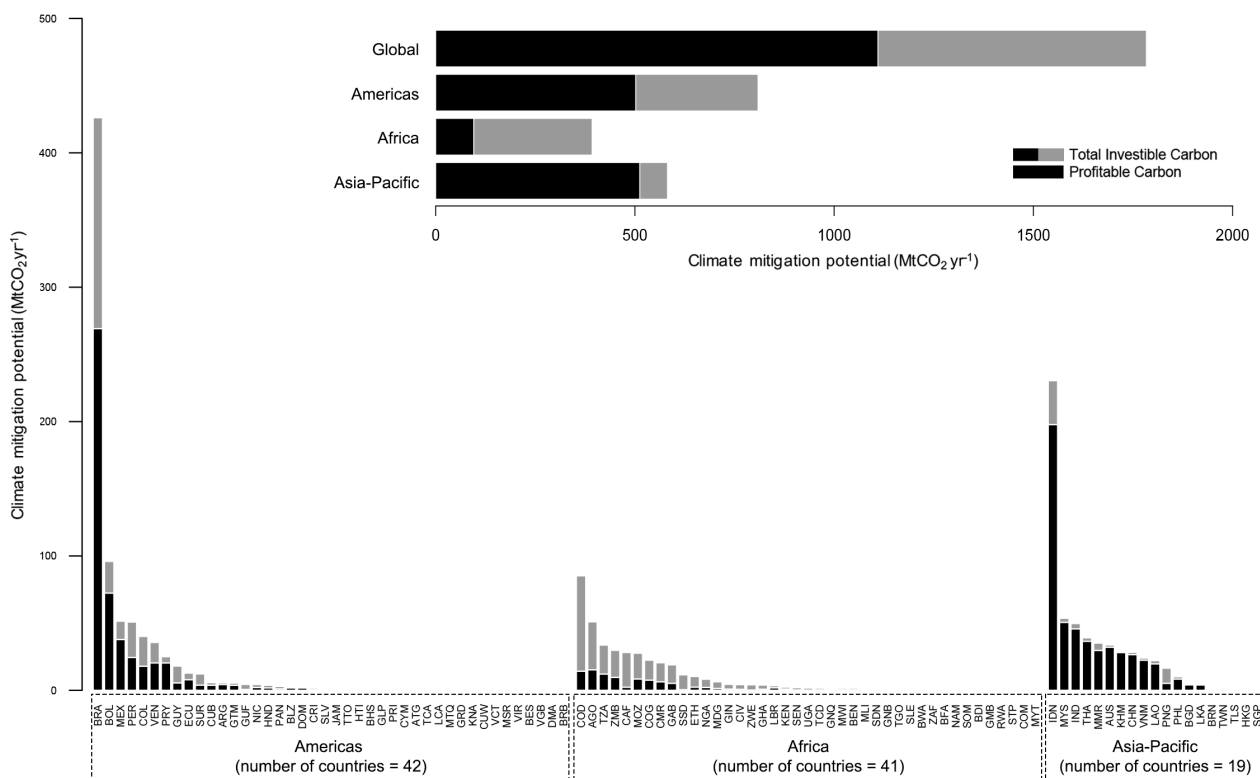

**Supplementary Figure 2: Difference between volumes of investible and profitable carbon credit at global, regional and country levels.** Country abbreviations are based on ISO 3166-1 alpha-3 codes.
